# Supplementary material for: Economic burden of pertussis, its influencing factors, and hospitalization determinants among older adults (≥ 60 years) in Zhejiang, China: A cross-sectional study (2024–2025)
Source: Research Square preprint supplement (doi:10.21203/rs.3.rs-8311185/v1), 2026-02-09
Supplement: Supplementary file 1 [file 682c9c4e07b27f875415886d.docx]

**Questionnaire on the Economic Burden of Pertussis Among Older Adults in Zhejiang Province**

Survey Area：

Survey Code：

**1** **Sociodemographic Characteristics**

1.1 Sex: ☐Male ☐Female

1.2 Date of Birth： (Year/Month/Day)

1.3 Residence Type: ☐Rural ☐Urban

1.4 Education Level: ☐Illiteracy ☐Primary ☐Lower secondary ☐Upper secondary or above

1.5 Employment Status: ☐Unemployed ☐Employed

1.6 Underlying disease☐No ☐Yes

1.7 Medical Insurance Type(s): ☐Resident Basic Medical Insurance ☐Employee Basic Meidcal ☐Uninsured ☐Others

**2 Clinical characteristics**

2.1 Date of Symptom Onset: (Year/Month/Day)

2.2 Date of Diagnosis: (Year/Month/Day)

2.3 Fever: ☐No ☐Yes

2.4 Cough: ☐No ☐Yes

2.5 Coinfection with Other Respiratory Pathogens: ☐No ☐Yes

2.5.1 If yes, Specific Pathogen(s): ☐Influenza virus ☐Parainfluenza virus ☐SARS-CoV-2☐Respiratory syncytial virus (RSV) ☐Adenovirus ☐Rhinovirus ☐Humanmetapneumovirus (hMPV) ☐Haemophilus influenzae (H. influenzae) ☐Streptococcus pneumoniae (S. pneumoniae) ☐Mycoplasma pneumoniae ☐Chlamydia pneumoniae ☐Legionella pneumophila ☐Others:

2.6 Complications: ☐No ☐Yes

2.6.1 If yes, Sspecific Complication(s): ☐Bronchitis ☐Pneumonia ☐Encephalitis ☐Emphysema ☐Respiratory failure ☐Others:

**3 Economic Burden**

3.1 Case Type: ☐Outpatient ☐Inpatient

3.2 Outpatient/ Emergency Visits Due to Pertussis

| Visits No. | Visit Date | Name of Heathcare Institution | Healthcare Institution Level | Number of Clinical Visit Companions | Medical Expenses (RMB) | Transport Expenses (RMB) | Nutritional and Meal Expenses (RMB) |
| --- | --- | --- | --- | --- | --- | --- | --- |
| 1 |  |  |  |  |  |  |  |
| 2 |  |  |  |  |  |  |  |
| ... |  |  |  |  |  |  |  |

3.3 Hospitalization Due to Pertussis

| Visits No. | Visit Date | Name of Heathcare Institution | Heathcare Institution Level | Inpatient Days | Medical Expenses (RMB) | Transport Expenses （RMB) | Nutritional and Meal Expenses (RMB) | Caregiver Service Fees (RMB) | Total Person-Days of Inpatient Companions | Total Person-Days of Hospital Visitors |
| --- | --- | --- | --- | --- | --- | --- | --- | --- | --- | --- |
| 1 |  |  |  |  |  |  |  |  |  |  |
| 2 |  |  |  |  |  |  |  |  |  |  |
| ... |  |  |  |  |  |  |  |  |  |  |

3.4 Self-purchased Medications for Pertussis: No ☐Yes ( RMB)

Survey Institutiont：

Surveyor：

Survey Date： (Year/Month/Day)

Contact Telephone：

**Instructions for Completing the Questionnaire**

**1 Purpose**

This questionnaire aims to collect accurate data on the economic burden of pertussis among older adults in Zhejiang Province. All information will be used for academic research only. Please answer truthfully and completely based on actual situations to ensure data reliability.

**2 Eligibility Criteria for Respondents**

Eligible respondents are older adults (≥ 60 years old) diagnosed with pertussis in Zhejiang Province, or their legal guardians (if the respondent is unable to complete the questionnaire independently due to physical or cognitive reasons).

**3 Completion Guidelines**

**3.1 General Requirements:** Use clear and standardized expressions. For yes/no questions, tick (☐) the corresponding option; for fill-in items, write in Arabic numerals or specific text as required. Avoid ambiguous or incomplete answers.

**3.2 Date Format:** All date items (e.g., Date of Birth, Date of Symptom Onset) must be filled in as Year/Month/Day (e.g., 2024/10/15).

**3.3 Monetary Items:** All cost-related data (e.g., Medical Costs, Transportation Costs) should be filled in with actual amounts in Renminbi (RMB). For "Self-Purchased Medications," specify the total amount if answering "Yes."

**3.4 Multiple Options:** For items with multiple choices (e.g., Medical Insurance Type, Specific Coinfection, Specific Complication), tick (☐) all applicable options; if "Others" is selected, please specify details in the blank space provided.

**3.5 Table Completion:** For outpatient/emergency visits and hospitalizations, fill in each visit separately in chronological order. If there are more than 2 visits, add rows as needed (mark "3," "4," etc., in the "Visit No." column).

**3.6 Definition Clarifications:**

"Number of Clinical Visit Companions": The number of individuals accompanying the respondent during each clinical visit (excluding medical staff).

"Total Person-Days of Inpatient Companions": Total days that companions stay with the respondent during hospitalization (e.g., 2 companions staying for 3 days each = 6 person-days).

"Total Person-Days of Hospital Visitors": Total days that non-accompanying visitors (e.g., relatives, friends) visit the respondent during hospitalization.

**4 Data Confidentiality**

All personal information and survey data will be processed anonymously. No individual identifiers (e.g., name, ID number) will be included in the final research report. The data will be stored securely and dealed after the research is completed in accordance with academic ethics requirements.

**5 Contact Information**

If you have any questions about the questionnaire content or completion method, please contact the survey team via the telephone number provided on the last page.

Thank you for your cooperation and support!
